# Supplementary material
Source: PubMed Central journal article supplement (PMC2483374)
Supplement: tpc.108.060020_1.pdf [file tpc.108.060020_1.pdf]

## Supplementary Materials

### Light-induced phosphorylation and degradation of the negative regulator PIF1 depends upon its direct physical interactions with photoactivated phytochromes

Hui Shen, Ling Zhu, Alicia Castillon, Manoj Majee, Bruce Downie and Enamul Huq

| Gene                             | Forward Primer                      | Reverse Primer                      |
|----------------------------------|-------------------------------------|-------------------------------------|
| <b>Cloning</b>                   |                                     |                                     |
| <i>PIF1N150</i>                  | CCAATCGATGTTCAAACCCAGAGACTTCA       | AGATATTACATCTCTTGGTAGATGTTGT        |
| <i>PIF1C151-478</i>              | GATATCGATCTGAGAGGGGATTTAAT          | GTGGTCGACTCACCTGTTGTGTGGTTTC        |
| <i>PIF1-NT-bHLH</i>              | GTCATCGATAAGAGATCTCGTGCTGCT         | CTGGTCGACATCATCTGTATTTGAA           |
| <i>PHYA-N100</i>                 | CGACATATGGAGAATGCATCTGAGCTGTTG      | CTACTTGTTTGCTGCAGCGAGCTCGAGTC       |
| <i>PHYA-NT</i>                   | CGACATATGATGTCAGGCTCTAGGCCGACTC     | GACTCGAGCTAACTATCCTTGAAAGCATTCC     |
| <i>PHYA-CT</i>                   | CGACATATGGAACTACTGATGTGAATACA       | CTACTTGTTTGCTGCAGCGAGCTCGAGTC       |
| <i>PHYA-C712</i>                 | CGACATATGATGTCAGGCTCTAGGCCGACTC     | GACTCGAGCTAACTAACTTATTGGCCCAGC      |
| <i>PHYA-C812</i>                 | CGACATATGATGTCAGGCTCTAGGCCGACTC     | GACTCGAGCTATAGACGACAACATGACTTCTG    |
| <i>PHYA-C1022</i>                | CGACATATGATGTCAGGCTCTAGGCCGACTC     | GACTCGAGCTACATCAGCATGAAATCTGCCAA    |
| <i>PHYA-C1072</i>                | CGACATATGATGTCAGGCTCTAGGCCGACTC     | GACTCGAGCTACATTTGGTTTAGTAAAACTCAGG  |
| <b>Site-directed mutagenesis</b> |                                     |                                     |
| PIF1E293D                        | CATAATCTCTCTGACAGAAAACGGAGAGATAG    | CTATCTCTCCGTTTTCTGTCAGAGAGATTATG    |
| PIF1E41A                         | AGATGATGATCTTATGGCGCTTTTATGGCAGAACG | CGTTCTGCCATAAAAGCGCCATAAGATCATCATCT |
| PIF1L42A                         | ATGATGATCTTATGGAGGCTTTATGGCAGAACGGT | ACCGTTCTGCCATAAAGCCTCCATAAGATCATCAT |
| PIF1W44A                         | ATCTTATGGAGCTTTTAGCGCAGAACGGTCAAGTT | AACCTGACCGTTCTGCGCTAAAAGCTCCATAAGAT |
| PIF1G47A                         | GCTTTTATGGCAGAACGCTCAAGTTGTTGTTCAA  | TTGAACAACAACCTTGAGCGTTCTGCCATAAAAGC |
| PIF1N144A                        | CCGCCGGTGAGGGCCTTCATGAATTTCTC       | GAGAAATTCATGAAGGCCCTCACCGGCGG       |
| PIF1S123A                        | ACCGCGACGGTGGCTCAAGTCACCGCC         | GGCGGTGACTTGAGCCACCGTCGCGGT         |
| PIF1G160A                        | GATTTTAATAACGGTAGAGCTGGTGAATCTGGACC | GGTCCAGATTCACCAGCTCTACCGTTATTTAAATC |
| PIF1G153A                        | TTCTCGAGGCTGAGAGCGGATTTAATAACGG     | CCGTTATTTAAATCCGCTCTCAGCCTCGAGAA    |
| PIF1L95A                         | GAAATGACTTCTTGGGCTCATTATCCTCTCCG    | CGGAGAGGATAATGAGCCCAAGAAGTCATTT     |
| PIF1F148A                        | GAGGAACCTCATGAATGCCTCGAGGCTGAGAGGGG | CCCCTCTCAGCCTCGAGGCATTATGAAGTTCTC   |
| PIF1F155A                        | GAGGCTGAGAGGGGATGCTAATAACGGTAGAGGTG | CACCTCTACCGTTATTAGCATCCCCTCTCAGCCTC |
| PIF1del11                        | CTTCAGATCAGAATCTTATTATCCTCTCCGTGA   | TCACGGAGAGGATAATGAAGATTCTGATCTGAAG  |
| PIF1del34                        | CCTTCTCAGATCAGAATGCTACCGCGACGGTGAG  | CTCACCGTCGCGGTAGCATTCTGATCTGAAGAAGG |
| PIF1del43                        | CCGCACCTACTGCGACGGGTGAATCTGGACCGTT  | AACGGTCCAGATTCACCCGTCGAGTAGGTGCGG   |



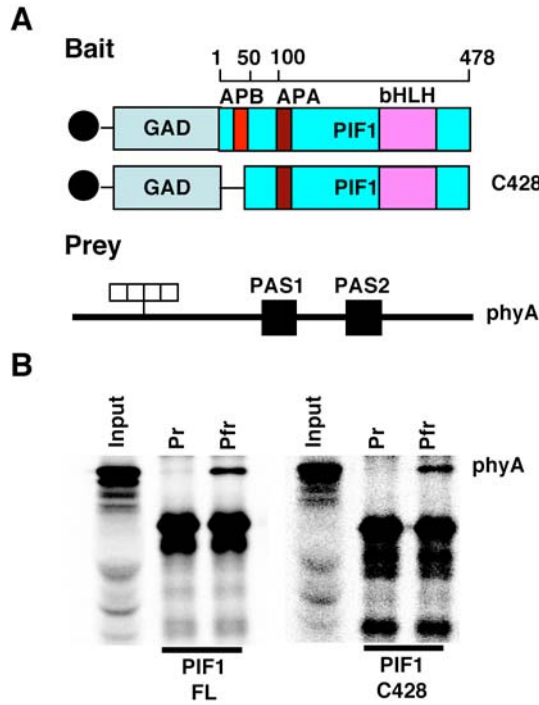

**Supplementary Figure 2: The APB motif is not responsible for the interaction of PIF1 with phyA.** A) Schematic diagram of the bait and prey used for the co-immunoprecipitation assays. The amino acid region deleted in the experimental construct C428 is indicated. B) Autoradiograph showing interactions of wild type PIF1, or a truncated PIF1 with the first 50 amino acids deleted (PIF1C428) with the Pr and Pfr forms of full length phyA. The leftmost lane of each set shows the input and the right two lanes show the pellet fractions from the *in vitro* co-immunoprecipitation assays.

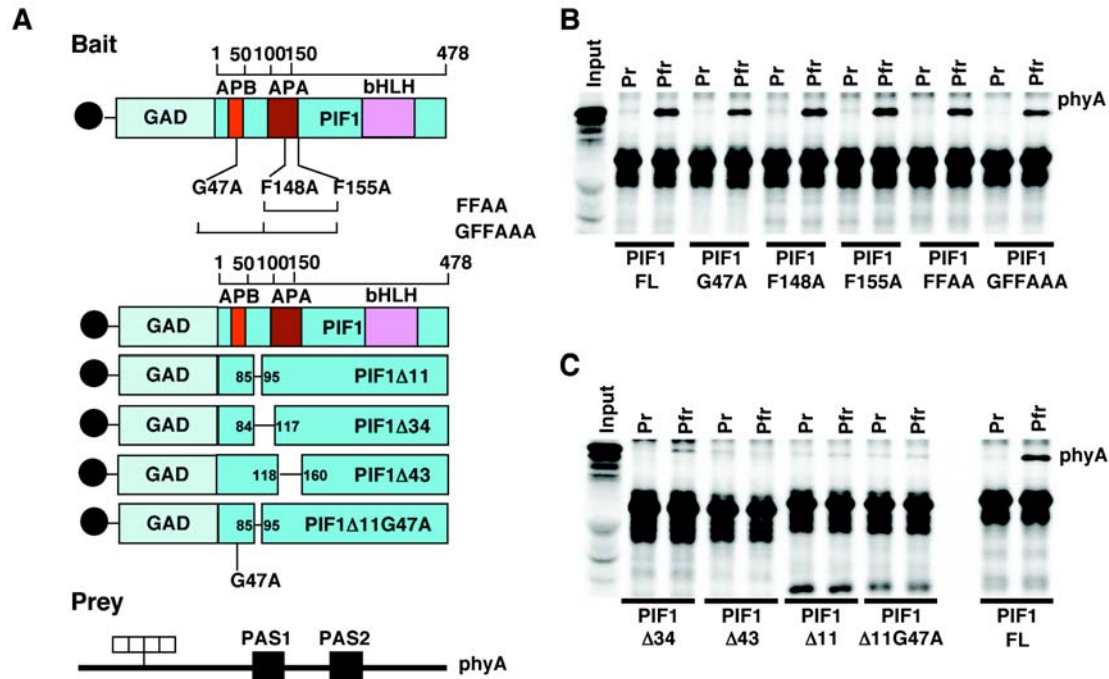

**Supplementary Figure 3: The putative APA motif present in PIF3 is not responsible for the Pfr-specific interaction of PIF1 with phyA.** A) Schematic diagram of the bait and prey used for the co-immunoprecipitation assays. The amino acid residues mutated or deleted in each construct are marked. B) Autoradiograph showing interactions of wild type PIF1, PIF1G47A, PIF1F148A, PIF1F155A, PIF1FFAA and PIF1GFFAAA with the Pr and Pfr forms of phyA. The leftmost lane shows the input and the others show the pellet fractions from the *in vitro* co-immunoprecipitation assays. C) Autoradiograph showing interactions of wild type and various deletion mutants of PIF1 with the Pr and Pfr forms of phyA. The leftmost lane shows the input and the others show the pellet fractions from the *in vitro* co-immunoprecipitation assays.

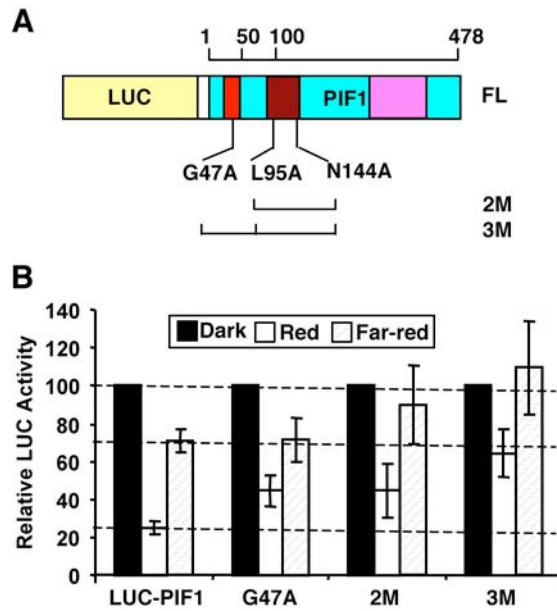

**Supplementary Figure 4: Direct interactions of PIF1 with phyA and/or phyB are necessary for the light-induced degradation of PIF1.** A) The amino acid residues mutated in the LUC-PIF1 constructs are shown. B) LUC activity was measured from 4-day-old dark-grown seedlings transferred to continuous R ( $10 \mu\text{molm}^{-2}\text{s}^{-1}$ ) or FR ( $10 \mu\text{molm}^{-2}\text{s}^{-1}$ ) light for 1 h as described (Shen et al., 2005). Means  $\pm$  SE of five biological replicates are shown.

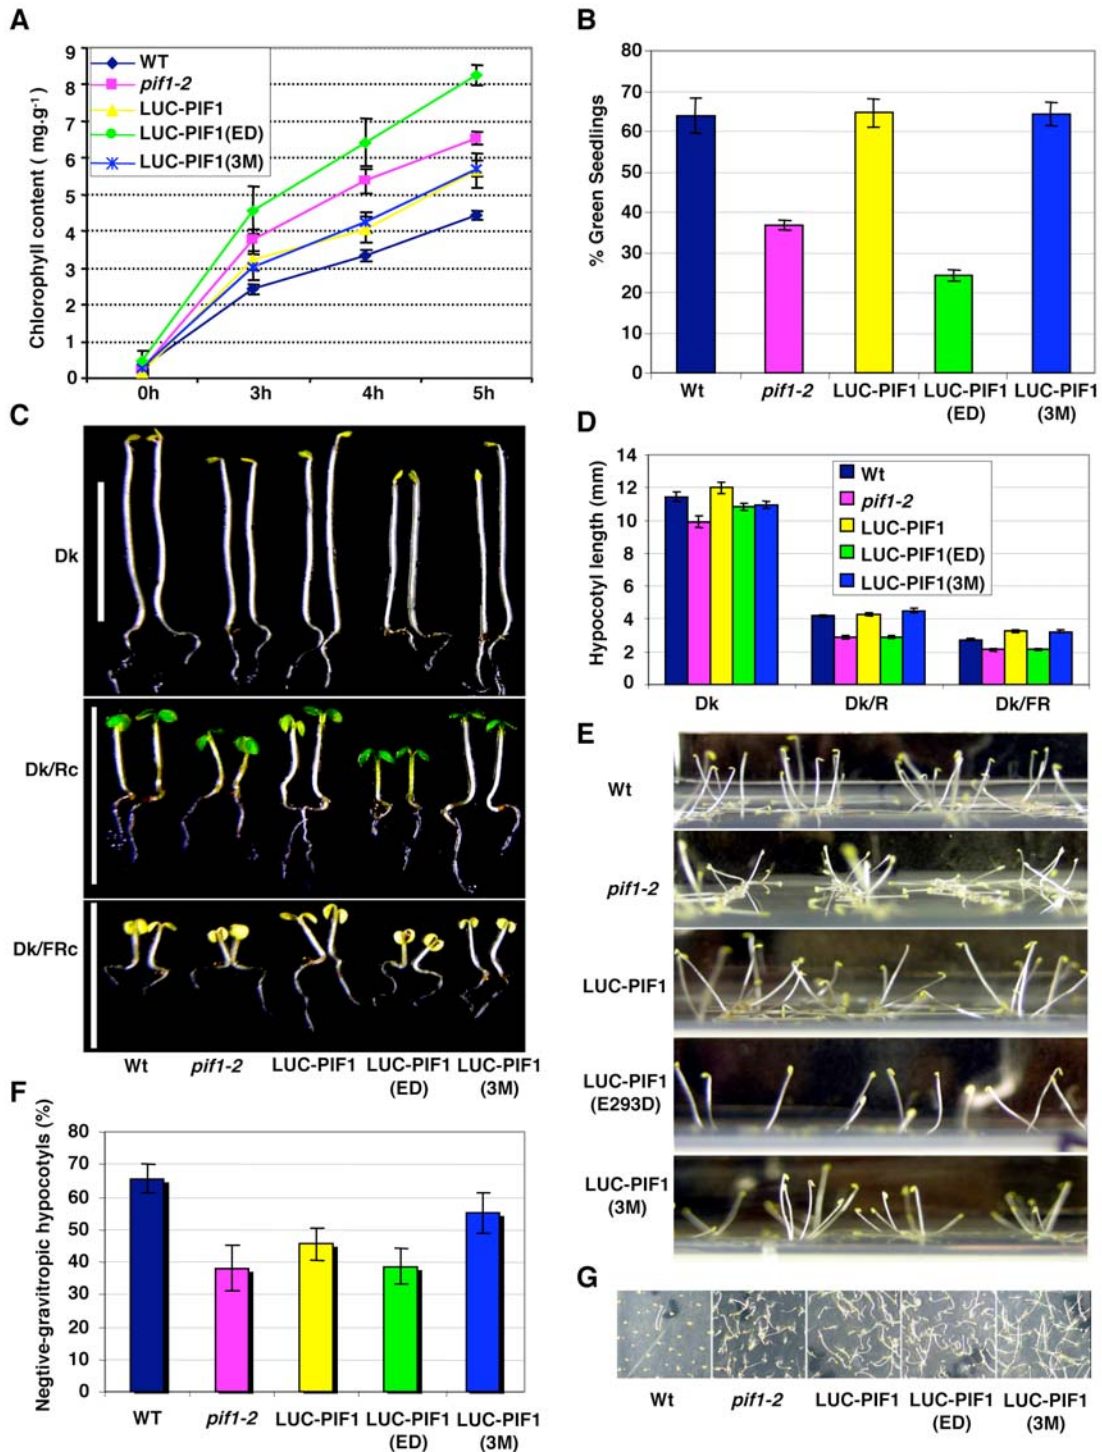

**Supplementary Figure 5: Rescue of the *pif1-2* chlorophyll biosynthetic phenotypes in the transgenic seedlings expressing wt and point mutant versions of PIF1.**

A) Chlorophyll content in transgenic seedlings. Transgenic lines: *LUC-PIF1* (LP-FL), *LUC-PIF1-E293D* (LP-ED) and *LUC-PIF1-3M(G47A,N144A,L95A)* (LP-3M) in the *pif1-2* background were

grown with wild type and *pif1-2* mutants for 2.5 days in the dark and then transferred to  $80 \mu\text{molm}^{-2}\text{s}^{-1}$  white light for 3, 4 or 5 h. Total chlorophyll content was determined as in Huq *et al.*, (2004). Means  $\pm$  SE of three biological replicates are shown. B) Transgenic, wild type and *pif1-2* mutant seedlings were grown for 5 days in the dark and then transferred to white light for two days. Green seedlings were counted and expressed as percentage of green seedlings/genotype. Means  $\pm$  SE of three biological replicates are shown ( $n \geq 30$ ). C) Visible phenotypes of the transgenic, wild type and *pif1-2* seedlings grown under 12h red light (Rc,  $15 \mu\text{molm}^{-2}\text{s}^{-1}$ ) or far-red light (FRc,  $12 \mu\text{molm}^{-2}\text{s}^{-1}$ ) /12h dark cycles for 4 days. White bar = 10 mm. D) Bar-graph showing hypocotyl lengths of the transgenic, wild type, and *pif1-2* seedlings grown as described in (C). Means  $\pm$  SE of three biological replicates are shown ( $n \geq 30$ ). E) Visible gravitropic phenotypes of the transgenic, wild type and *pif1-2* seedlings grown in the dark. F) Percentage of hypocotyls in each genotype that displayed negative gravitropism in the dark. Means  $\pm$  SE of three biological replicates are shown ( $n \geq 30$ ). G) Visible phenotype of seed germination in the transgenic, wild type and *pif1-2* lines exposed to FR ( $3.2 \mu\text{molm}^{-2}\text{s}^{-1}$ ) light for 5 min and then incubated in the dark for 6 days. Wild type seeds do not complete germination in FR light conditions.

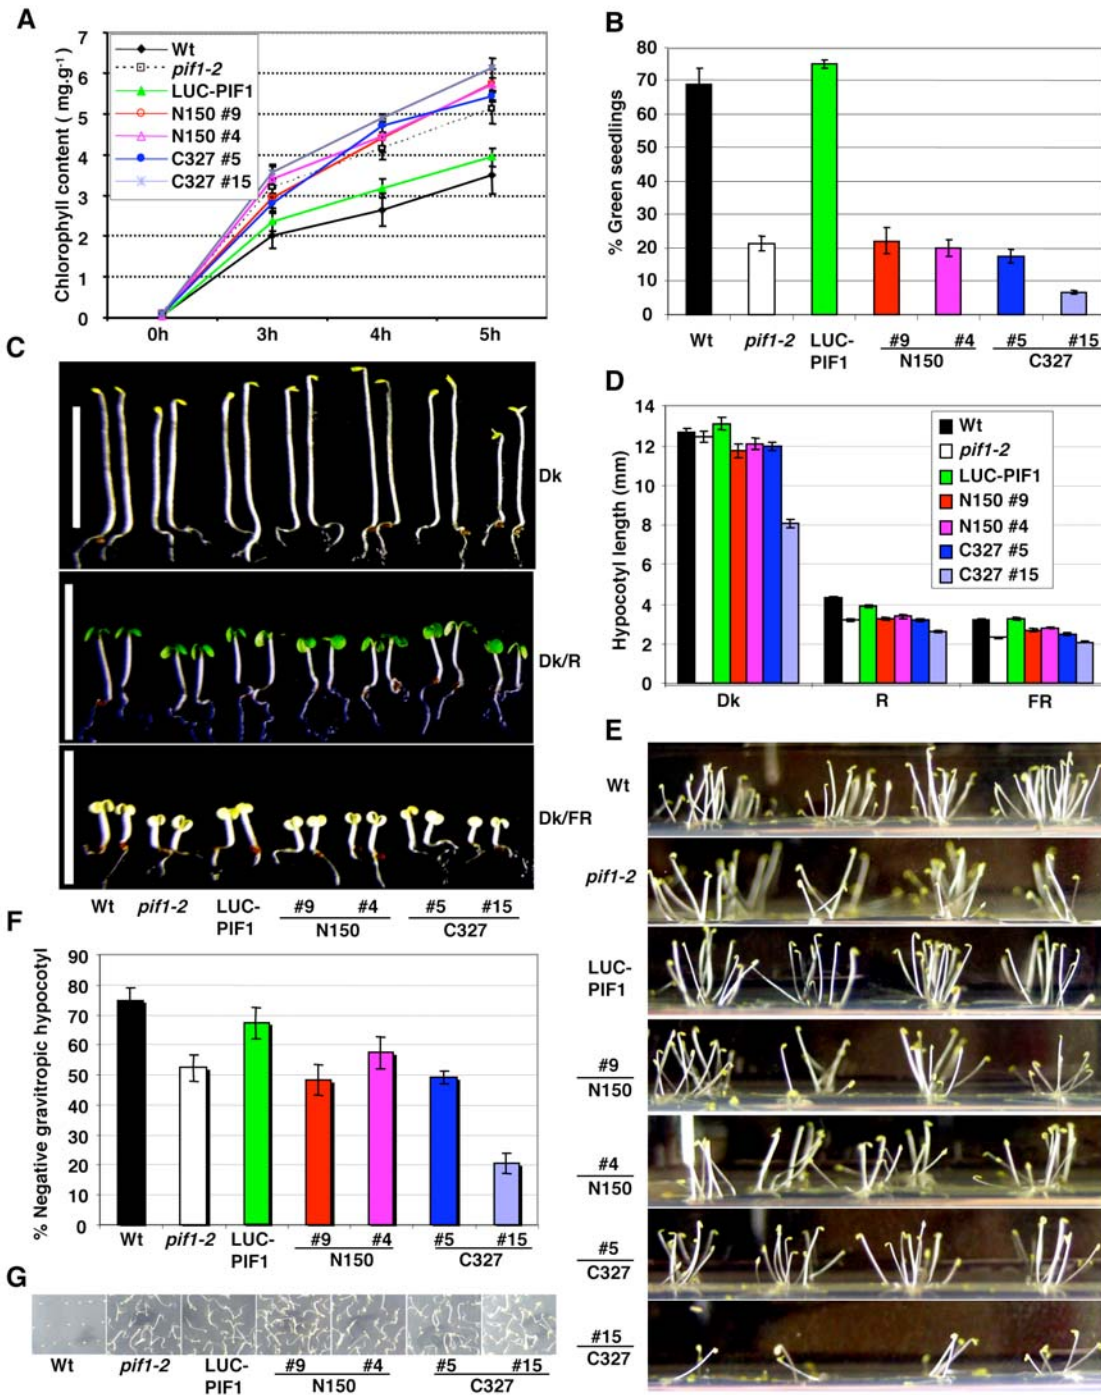

**Supplementary Figure 6: Rescue of the *pif1-2* chlorophyll biosynthetic phenotypes in the transgenic seedlings expressing wild type and truncated versions of PIF1.**

A) Chlorophyll content in wild type, *pif1-2* and the transgenic seedlings. Two independent *LUC-PIF1* N-terminal (N150 line #9 and line #4) and C-terminal (C327 line #5 and line #15) truncated transgenic lines created in the *pif1-2* background were grown with the wild type, *pif1-2* mutant and LP line for chlorophyll measurements as described (Huq *et al.*, 2004). Means  $\pm$  SE of three biological



replicates are shown. B) Transgenic, wild type and *pif1-2* mutant seedlings were grown for 6 days in the dark and then transferred to white light for two days. Green seedlings were counted and expressed as percentage of green seedlings/genotype. Means  $\pm$  SE of three biological replicates are shown ( $n \geq 30$ ). C) Visible phenotypes of the transgenic, wild type and *pif1-2* seedlings grown under 12h red- (Rc,  $15 \mu\text{molm}^{-2}\text{s}^{-1}$ ) or far-red-light (FRc,  $12 \mu\text{molm}^{-2}\text{s}^{-1}$ )/12h dark cycles for 4.5 days. White bar = 10 mm. D) Bar-graph showing hypocotyl lengths of the transgenic, wild type, and *pif1-2* seedlings grown as described in (C). Means  $\pm$  SE of three biological replicates are shown ( $n \geq 30$ ). E) Visible gravitropic phenotypes of the transgenic, wild type and *pif1-2* seedlings grown in the dark. F) Percentage of hypocotyls in each genotype that displayed negative gravitropism in the dark. Means  $\pm$  SE of three biological replicates are shown ( $n \geq 30$ ). G) Visible phenotype of seed germination in transgenic, wild type and *pif1-2* lines exposed to FR ( $3.2 \mu\text{molm}^{-2}\text{s}^{-1}$ ) light for 5 min and then incubated in the dark for 6 days. Wild type seeds do not complete germination after FR light exposure.
